1                                    ***Molecular mechanisms of microbiome modulation***  
2                                    ***by the diatom secondary metabolite azelaic acid***

3 Ahmed A. Shibl<sup>1,a</sup>, Michael A. Ochsenkühn<sup>1</sup>, Amin R. Mohamed<sup>1</sup>, Lisa Coe<sup>1</sup>, Yejie Yun<sup>1,b</sup>, Shady A.  
4 Amin<sup>1,\*</sup>

5  
6 <sup>1</sup>Marine Microbial Ecology Laboratory, Biology Program, New York University Abu Dhabi, Abu Dhabi  
7 129188, United Arab Emirates

8 <sup>a</sup>Current affiliations: Genetic Heritage Group, Biology Program, New York University Abu Dhabi, Abu  
9 Dhabi 129188, United Arab Emirates & Public Health Research Center, New York University Abu  
10 Dhabi, Abu Dhabi 129188, United Arab Emirates

11 <sup>b</sup>Current affiliation: Computational Biology Department, Carnegie Mellon University, Pittsburgh, PA  
12 15213

13 \*Corresponding author: [samin@nyu.edu](mailto:samin@nyu.edu)

14

15 **Keywords**

16 azelaic acid | microbiomes | signaling | diatom | phytoplankton–bacteria interactions | secondary  
17 metabolites

18

19 **Abstract**

20 Photosynthetic eukaryotes, such as plants and microalgae, modulate their microbiome using the  
21 dicarboxylate metabolite azelaic acid (Aze), a molecule that is used as a carbon source for some  
22 heterotrophs but is toxic to others. Uptake and assimilation mechanisms of Aze into bacterial cells  
23 are mostly unknown, nor its ability to promote or inhibit growth. Here, we use transcriptomics,  
24 isotope labeling, and coexpression networks of master transcriptional factors in two marine  
25 bacteria to identify the first putative Aze transporter in bacteria, map Aze catabolism through fatty  
26 acid degradation and downstream pathways, infer Aze toxicity to the ribosome, and show that  
27 Aze catabolism is restricted to 13 bacterial families across terrestrial and marine ecosystems  
28 dominated by algal and plant symbionts. Seawater mesocosms amended with Aze enrich for  
29 bacterial families that are able to catabolise Aze. These findings shed light on the role of  
30 infochemicals in modulating eukaryote-microbiome interactions across diverse ecosystems.

31

32

33

## 34 Introduction

35 The C<sub>9</sub> dicarboxylic acid, azelaic acid (hereafter Aze) is a ubiquitous, yet enigmatic  
36 metabolite produced by photosynthetic organisms, such as plants in terrestrial ecosystems and  
37 phytoplankton in aquatic environments (Khakimov et al., 2014; Shibl et al., 2020). It is postulated  
38 to be a product of the peroxidation of galactolipids (Zoeller et al., 2012), yet its exact biosynthetic  
39 pathway is unknown. Aze plays a crucial role as an infochemical that primes systemic acquired  
40 resistance against phytopathogens (Jung et al., 2009; Spoel & Dong, 2012; Wittek et al., 2014)  
41 and influences microbial diversity in soil (Korenblum et al., 2020). In marine environments,  
42 diatoms secrete Aze to modulate bacterial populations by promoting the growth of symbionts  
43 while inhibiting opportunists simultaneously (Shibl et al., 2020). In pharmacology, Aze is widely  
44 used in human skin care products for its antimicrobial properties to treat inflammatory acne,  
45 rosacea, and other dermatological disorders since the 1970s (Nazzaro-Porro, 1987; Searle et al.,  
46 2020). Despite this undeniable importance, no Aze uptake proteins are known in bacteria and its  
47 assimilation into bacterial cells to promote or inhibit growth is poorly understood. A single gene  
48 has recently been identified in *Pseudomonas nitroreducens* that acts as a transcriptional regulator  
49 of Aze, *azeR* (Bez et al., 2020), yet its regulatory target(s) are unknown. Understanding the  
50 molecular mechanisms that enable the transport and assimilation of Aze into bacterial cells to  
51 induce positive or negative phenotypes will shed light on how eukaryotic hosts influence and  
52 control their microbiome.

53 To examine how bacteria transport and catabolise Aze, we used *Phaeobacter* sp. F10  
54 (hereafter *Phaeobacter*) as a model to study how Aze promotes bacterial growth and *Alteromonas*  
55 *macleodii* F12 (hereafter *A. macleodii*) as a model to study the inhibitory effects of Aze. Both  
56 bacteria were isolated from the diatom *Asterionellopsis glacialis* that was shown to produce Aze  
57 to modulate its microbiome (Shibl et al., 2020). A combination of transcriptomics, transcriptional  
58 coexpression networks of master transcriptional regulators, isotope labeling, and metabolomics  
59 were used to elucidate how these bacteria process Aze. In addition, *in situ* mesocosms with  
60 seawater microbial communities were conducted to examine how Aze influences microbial  
61 diversity in natural environments. We discover the first putative Aze transport system in bacteria  
62 and map out how each bacterium responds to and processes Aze through a complex regulatory  
63 network. In addition, we show that the Aze transport system and transcriptional regulator are  
64 prevalent in 13 families of bacteria spanning the terrestrial and marine environments and that *in*  
65 *situ* experiments with seawater microbes enrich microbial taxa that contain these genes.

## 66 **Materials and Methods**

### 67 Growth of bacterial isolates with Aze

68 Bacteria were grown for 24-48 hours in Zobell marine broth (ZoBell, 1941), then  
69 centrifuged and resuspended in sterile 10% Zobell marine broth at an OD<sub>600nm</sub> of 0.3. For  
70 *Phaeobacter*, aliquots of this stock were used to inoculate replicate flasks containing 1 L 10%  
71 Zobell marine broth each, for a final approximate OD<sub>600nm</sub> of 0.0003 (~7.5x10<sup>5</sup> cells/mL). For *A.*  
72 *macleodii*, this stock was used to inoculate sterile 10% marine broth solution at a final OD<sub>600nm</sub> of  
73 0.2. This was needed to evade the inhibitory effect of Aze on *A. macleodii* cells to achieve enough  
74 viable mRNA. Filter-sterilized azelaic acid (Sigma-Aldrich) was added to a final concentration of  
75 500 µM to all the treatments, and an equal volume of filter-sterilized Milli-Q water was added to  
76 controls. All cultures were shaken in a shaker-incubator at 26°C for 8 hours. Growth was  
77 estimated by measuring OD<sub>600nm</sub>. Cells were either centrifuged at 13,000 x g and cell pellets frozen  
78 or were filtered onto 0.22 µm Sterivex cartridges (Merck Millipore, Burlington, MA, USA) using a  
79 peristaltic pump at a flow rate of 40 mL/min. All cells were flash frozen in liquid nitrogen and stored  
80 at -80°C until RNA extraction.

### 81 RNA extraction and sequencing

82 Cartridges containing *Phaeobacter* cells were thawed on ice before extraction, while cell  
83 pellets of *A. macleodii* were processed directly from the freezer. Filter membranes were removed  
84 with sterile tweezers from cartridges and placed directly in the RLT lysis buffer (Qiagen). RNA  
85 was extracted from cell pellets and filter membranes using the RNeasy Mini Kit (Qiagen)  
86 according to the manufacturer's protocol. RNA samples were treated with DNase I to eliminate  
87 genomic DNA contamination and sent to NovogeneAIT Genomics (Singapore) for library  
88 preparation using the NEBNext Ultra RNA Library Prep Kit and paired-end (2x150) sequencing  
89 on the Illumina NovaSeq 6000 (San Diego, CA) platform. All time points were carried out in three  
90 biological replicates except for *Phaeobacter* at 0.5 hours, which had six replicates. All samples  
91 passed RNA QC except for one control replicate from *Phaeobacter* at 0.5 hours.

### 92 RNAseq analysis

93 Raw reads of *Phaeobacter* and *A. macleodii* samples were processed using fastp v0.22  
94 (Chen et al., 2018) for quality filtering, adapter removal, and trimming. The resulting sequences  
95 were then aligned with their respective genomes using Bowtie2 v2.3.5 (Langmead & Salzberg,  
96 2012). Resulting BAM files were processed on SAMtools v1.12 (Li et al., 2009) and read counts  
97 were generated with featureCounts v2.0.3 (Liao et al., 2014). Differential expression analysis

98 between treatment and control samples was done using DESeq2 v3.14 (Love et al., 2014) on R  
99 v4.1 (R Core Team). Genes were considered differentially expressed (DE) if they had a  $p$ -adjusted  
100 value of  $<0.05$  and  $\log_2$  fold change of  $\geq \pm 0.5$ . Pearson coefficient calculations and correlation  
101 plots were done using the R gplots package (Warnes et al., 2016). DE genes were fed into the  
102 Kyoto Encyclopedia of Genes and Genomes (KEGG) pathway database and the expression ratios  
103 for pathways of interest were calculated as follows:

$$104 \quad \text{Expression ratio} = \frac{\text{No. upregulated reactions} + \text{No. downregulated reactions}}{\text{No. reactions in pathway present in the genome}}$$

105 Scatter plots of genes in enriched KEGG pathways and bar plots of their expression ratios were  
106 generated using the R ggplot2 package (Wickham, 2016).

### 107 Phylogenetic analysis

108 Amino acid sequences of the azelaic acid transcriptional regulators, *azeR*, and azelaic  
109 acid TRAP substrate-binding protein (*azeT*) of *Phaeobacter* and *Pseudomonas nitroreducens*  
110 DSM9128 were used as queries on BLASTp. The search was done against the *nr* database with  
111 an e-value cutoff of  $1e-50$ . From the resulting hits, duplicates and sequences less than 250 amino  
112 acids were removed. In addition, any sequences with an unknown or unclassified taxonomy were  
113 removed. Only species containing both proteins were retained, and their homologs with the lowest  
114 e-value and highest bitscore were used for phylogenetic inference. SeqKit (Shen et al., 2016) was  
115 used to concatenate *azeR* and *azeT* sequences from the same taxa. The multiple sequence  
116 alignment was built by Kalign3 (Lassmann, 2020) and a maximum-likelihood tree was generated  
117 with FastTree v2.1.11 (Price et al., 2010) with 1,000 bootstraps. The resulting phylogenetic tree  
118 was visualized and annotated on iTOL v5 (Letunic & Bork, 2021) and Inkscape v1.1.1  
119 (<https://inkscape.org/>).

### 120 Isotope labeling and metabolomics

121 *Phaeobacter* cells were grown as described above. Filter-sterilized azelaic acid- $^{13}\text{C}_9$   
122 (Sigma-Aldrich) was added to triplicate cultures with an  $\text{OD}_{600\text{nm}}$  of 0.3 at a final concentration of  
123  $500 \mu\text{M}$  and cultures were shaken in a shaker-incubator at  $26^\circ\text{C}$ . Two-mL samples were collected  
124 at 0, 15, 30, 60 and 120 minutes after addition of azelaic acid and centrifuged at  $13,000 \times g$  for 5  
125 minutes at  $4^\circ\text{C}$ , resuspended and washed with  $35 \text{ g/L NaCl}$  in PBS, then centrifuged and  
126 resuspended in ice cold 100% methanol. Subsequently, samples were sonicated for 2 minutes  
127 on ice, then centrifuged at  $4^\circ\text{C}$  for 5 minutes. Supernatant was collected and dried under nitrogen  
128 flow, then extract was stored at  $-20^\circ\text{C}$  until analysis using mass spectroscopy.

129 Samples for direct infusion measurements are prone to salt interference and thus solid-  
130 phase extraction with PPL-bond elut columns (Agilent Technologies, US) was applied. High-  
131 resolution mass spectra were acquired on a Bruker solariX XR Fourier-transform ion cyclotron  
132 resonance mass spectrometer (FT-MS) (Bruker Daltonics GmbH, Germany) equipped with a 7T  
133 superconducting magnet and operated in ESI (+) ionization mode with 0.5 bar nebulizer pressure,  
134 4.0 L dry gas and a 220 °C capillary temperature. Source optics parameters were 200 V at  
135 capillary exit, 220 V deflector plate, 150V funnel 1, 15V skimmer 1, 150 Vpp funnel RF amplitude,  
136 octopole frequency of 5 MHz and an RF amplitude of 450 Vpp. Para Cell parameters were set to  
137 -20V transfer exit lens, -10V analyzer entrance, 0V side kick, 3V front and back trap plates, -30V  
138 back trap plate quench and 24% sweep excitation power. For sample injection, a Triversera  
139 Nanomate (Advion BioSciences Inc., US) with 1 psi gas pressure and ESI (+) voltage of 1.7kV  
140 was used. Three-hundred and twenty scans were accumulated for each sample with an  
141 accumulation time of 200 ms and acquired with a time domain of 4 mega words over a mass  
142 range of m/z 75 to 1200, at an optimal mass range from 200-600 m/z. Spectra were internally  
143 calibrated using primary metabolites (e.g., amino acids, organic acids) in Data analysis 5.0  
144 Software (Bruker Daltonics GmbH, Bremen, Germany). The FT-MS mass spectra were exported  
145 to peak lists with a cut-off signal-to-noise ratio (S/N) of 4. The masses for relevant <sup>13</sup>C isotope-  
146 labeled metabolites were calculated using enviPat: isotope pattern calculator (Loos et al., 2015).  
147 MSMS was performed at 15V, 25V and 35V collision voltage and characteristic fragments  
148 identified manually.

#### 149 Seawater mesocosm and 16S rRNA sequencing

150 Seawater samples were collected in July 2021 from surface waters off the coast of  
151 Saadiyat Island (24°38'28.6"N 54°27'09.4"E), United Arab Emirates, kept in the dark, and  
152 immediately brought back to the lab. For a mesocosm experiment, the seawater was filtered  
153 through a 1.2-µm filter (Whatman, UK) to remove most phytoplankton and divided into 12 vessels  
154 each containing 30 mL. Control replicates (*n*=4 at T=0 hours) were immediately filtered onto a  
155 0.2-µm filter (Whatman, UK) to capture microbial cells. Treatment replicates (*n*=4) with 100 µM  
156 Aze and another set of control replicates (*n*=4) with an equal volume of Milli-Q water added in lieu  
157 of Aze were incubated at 24°C for 16 hours in the dark (T=16 hours). After incubation, they were  
158 immediately filtered onto a 0.2-µm filter (Whatman, UK). Genomic DNA was extracted  
159 immediately after filtration from all filters using the DNeasy PowerWater Kit (Qiagen) and sent to  
160 NovogeneAIT Genomics (Singapore) for 16S rRNA amplification using the 515F-Y (5'-  
161 GTGYCAGCMGCCGCGGTAA-3') and 926R (5'-CCGYCAATTYMTTTRAGTTT-3') universal

162 primers and paired-end (2x250bp) sequencing on the Illumina NovaSeq 6000 (San Diego, CA)  
163 platform.

164 Clean raw reads were processed with the rANOMALY R package (Theil & Rifa, 2021)  
165 using the dada2 R package (Callahan et al., 2016) to generate amplicon sequence variants  
166 (ASVs). Taxonomic classification was based on the SILVA v138 database. Alpha-diversity was  
167 assessed using the richness indices; observed ASVs and Chao1, and diversity indices; Shannon  
168 and Simpson. Beta-diversity was assessed and visualized by principal coordinate analysis  
169 (PCoA) based on pairwise Bray-Curtis distance and tested by the permutational analysis of  
170 variance (PERMANOVA). The differential abundance of taxa across the treatment and control  
171 samples was calculated with DESeq2 v3.14 (Love et al., 2014) with a  $p$ -adjusted value cutoff of  
172  $< 0.05$ . All plots were generated using the ggplot2 and phylosmith (Smith, 2019) R packages and  
173 all statistical analyses were performed on R 4.1.2.

#### 174 Transcriptional master regulator analysis

175 We deployed the regulatory impact factor (RIF) algorithm (Reverter et al., 2010) to detect  
176 transcription factors (TFs) with high regulatory potential contributing to the observed  
177 transcriptional remodeling upon Aze uptake. RIF is designed to identify key regulatory loci  
178 contributing to transcriptome divergence between two biological conditions. Predicted TF lists  
179 were obtained from the genome annotation (GFF file) of both *Phaeobacter* and *A. macleodii* and  
180 normalized data (variance stabilized,  $\log_2$ -transformed counts) of these genes were retrieved. The  
181 same normalization strategy was applied to the DE genes. An expression matrix containing  
182 normalized expression of the TF genes and DE genes were subjected to RIF analysis per species.  
183 RIF analysis identifies regulators that are consistently differentially co-expressed with highly  
184 abundant and highly DE genes (RIF1 metric) and regulators that have the most altered ability to  
185 act as predictors of the abundance of DE genes (RIF2 metric). TFs were considered significant  
186 when the RIF score deviates  $\pm 1.96$  standard deviation from the mean (t-test,  $P < 0.05$ ).

#### 187 Transcriptional coexpression networks (TCNs)

188 The Partial Correlation and Information Theory (PCIT) (Reverter & Chan, 2008) has been  
189 extensively used for gene network analysis (Alexandre et al., 2021; Botwright et al., 2021). We  
190 utilized PCIT to detect significant connections (edges) between pairs of genes (nodes) while  
191 considering the influence of a third player (gene). PCIT calculates pairwise correlations between  
192 given gene pairs after considering all possible three-way combinations of genes (triads) present  
193 within a gene expression matrix. The algorithm calculates partial correlations after exploring all



194 triads before determining the significance threshold that depends on the average ratio of partial  
195 and direct correlation. The set of key regulatory TFs (identified by RIF analysis) and DE genes  
196 per species were used for construction of the networks. Normalized data (variance stabilized,  
197  $\log_2$ -transformed counts) of these genes were used for network construction. The PCIT-inferred  
198 networks were visualized using Cytoscape Version 3.9 (Shannon et al., 2003). From these initial  
199 networks, we explored a series of subnetworks; first connections between nodes were considered  
200 when the partial correlation  $r$  was greater than  $\pm 0.95$ . From these networks, hub genes (potential  
201 regulatory components within the network) and their connected genes (first neighbors) were  
202 extracted based on: 1) key regulatory factors (with highest RIF scores), 2) differential expression  
203 significance, and 3) degree centrality (the number of connections of a node with other nodes in  
204 the network).

#### 205 Data availability

206 RNAseq raw reads of *Phaeobacter* are deposited in NCBI under the BioProject number  
207 PRJNA823575. RNAseq raw reads of *A. macleodii* are deposited in NCBI under the BioProject  
208 number PRJNA823732. 16S rRNA amplicon sequencing raw reads are deposited in NCBI under  
209 the BioProject number PRJNA823745. All software packages used are open source.

210

## 211 **Results**

### 212 Growth and Transcriptional Response to Aze

213 To examine the effects of Aze on *Phaeobacter* and *A. macleodii*, each bacterium was  
214 grown in the presence of 500  $\mu$ M Aze and growth was compared to controls without Aze. As  
215 reported previously (Shibl et al., 2020), Aze induced a statistically significant increase in growth  
216 and overall cell yield of *Phaeobacter* while temporarily inhibiting the growth of *A. macleodii*  
217 (Extended Data Fig. 1). To capture the transcriptional responses of these bacteria to Aze addition,  
218 transcriptomic analyses were conducted from RNA samples collected at 0.5 and 8 hours after  
219 Aze addition in *Phaeobacter*, and at 0.5 hours from *A. macleodii*.

220 *Phaeobacter* differentially expressed 273 and 558 genes in response to Aze at 0.5 and 8  
221 hours, respectively, corresponding to  $\sim 20\%$  of all CDS in its genome (Extended Data Table 1).  
222 Most differentially expressed genes were upregulated (652) and most occurred at 8 hours (494).  
223 Only 70 genes were co-regulated at both 0.5 and 8 hours, suggesting the immediate, short-term  
224 response to Aze is generally different from long-term growth on the substrate. Indeed, hierarchical  
225 clustering of Pearson correlation coefficients for differentially expressed genes across all



226 conditions showed distinct clustering of growth on Aze at 0.5 hours relative to the other conditions  
227 (Extended Data Fig. 2a). In contrast, *A. macleodii* differentially expressed 274 genes at 0.5 hours,  
228 corresponding to ~7% of all CDS in its genome, half of which were upregulated (Extended Data  
229 Table 1, Extended Data Fig. 2b).

230 Global analysis of KEGG pathways of all three transcriptomes show significant contrasts  
231 between *Phaeobacter* and *A. macleodii* (Fig. 1). While fatty acid degradation, amino acid  
232 metabolism and degradation, ABC transporters, oxidative phosphorylation, propanoate  
233 metabolism, and glyoxylate and dicarboxylate metabolism pathways exhibited similar expression  
234 ratios (see Methods) across both bacteria in response to Aze, upregulated genes in these  
235 pathways were mostly dominated by *Phaeobacter* transcripts while downregulated genes were  
236 mostly enriched in *A. macleodii* transcripts. Interestingly, fatty acid degradation genes were  
237 among the most upregulated genes in *Phaeobacter* (Fig. 1).

238

### 239 Aze Catabolism by *Phaeobacter*

240 No uptake genes are known for Aze. A putative C<sub>4</sub>-dicarboxylate TRAP transporter  
241 substrate-binding protein (INS80\_RS11065) was the most and the third most upregulated gene  
242 in *Phaeobacter* grown on Aze at 0.5 and 8 hours, respectively. The small and large permease  
243 genes (INS80\_RS11060 and INS80\_RS11055) neighboring this gene were among the top 20  
244 most upregulated genes in the transcriptome at 0.5 hours and continued to be upregulated at 8  
245 hours, implicating these genes in transporting Aze (Fig. 2, Extended Data Table 2, Supplementary  
246 Data 1). All three genes are co-localized with the putative Aze transcriptional regulator, *azeR*  
247 (INS80\_RS11050, belonging to the *IclR* family transcriptional factor) (Shibl et al., 2020), which is  
248 upregulated at 0.5 hours. *In silico* operon predictions show that *azeR*, the small and large  
249 permeases all fall within a single operon while the substrate-binding gene is transcribed  
250 independently (Extended Data Fig. 3). We assign this cluster of genes the designation *azeTSLR*  
251 (*T*=substrate-binding protein, *S*=small permease, *L*=large permease, *R*=regulator). Once inside  
252 the cell, Aze appeared to be initiated into the fatty acid degradation pathway via a Paal family  
253 thioesterase and acyl-coA ligase (*fadD*) that were present directly downstream of *azeTSLR* and  
254 were putatively co-transcribed and upregulated at 0.5 hours (Fig. 2, Extended Data Fig. 3,  
255 Extended Data Table 2). Aze-coA was then putatively degraded through a series of steps  
256 catalyzed by genes in the fatty acid degradation pathway (*acd*, *paaF*, and *fadN*) that were among  
257 the most highly upregulated genes at 0.5 hours and continued to be upregulated at 8 hours (Fig.  
258 2, Extended Data Table 2, Supplementary Data 1). These successive reactions putatively

259 liberated two acetyl-coA molecules to generate glutaryl-coA. Glutaryl-coA can either be further  
260 degraded into acetyl-coA via *gcdH*, *paaF*, *fadN* and *atoB*, all of which were upregulated at both  
261 time points, or can be converted to glutaconyl-coA (Fig. 2).

262 To confirm the patterns observed in the *Phaeobacter* transcriptome and resolve the fate  
263 of glutaryl-coA, *Phaeobacter* was supplemented with  $^{13}\text{C}_9$ -Aze, and intracellular metabolomics  
264 samples were extracted and analyzed using a Fourier-transform ion cyclotron resonance mass  
265 spectrometer. Within 15-30 mins of addition of labeled Aze to cells,  $^{13}\text{C}_9$ -Aze,  $^{13}\text{C}_9$ -Azeloil-coA,  
266  $^{13}\text{C}_7$ -pimeloyl-coA and  $^{13}\text{C}_5$ -glutaryl-coA were detected and increased in relative abundance over  
267 the course of 2 hours (Fig. 2, Supplementary Data 3). In addition,  $^{13}\text{C}_5$ -glutaconyl-coA was  
268 detected at 2 hours and  $^{13}\text{C}_3$ -propionate-coA at 1-2 hours after addition of  $^{13}\text{C}_9$ -Aze. Glutaconyl-  
269 coA is a side product of glutaryl-coA that is shuttled into butanoate metabolism (Djurdjevic et al.,  
270 2011), while propionyl-coA is an important intermediate in glyoxylate and propanoate metabolism,  
271 indicating these pathways are activated downstream of Aze catabolism. Indeed, while fatty acid  
272 degradation was more upregulated at 0.5 hours than at 8 hours, glyoxylate and dicarboxylate  
273 metabolism, butanoate metabolism and other downstream pathways were more upregulated at 8  
274 hours than at 0.5 hours (Fig. 3a, Extended Data Table 2).

275

#### 276 Toxicity of Aze in *A. macleodii*

277 The genome of *A. macleodii* completely lacks any TRAP transport systems, suggesting  
278 Aze crosses the cell membrane non-specifically. In contrast to the *Phaeobacter* transcriptome,  
279 the highest upregulated gene 0.5 hours after Aze addition to *A. macleodii* was an efflux RND  
280 transporter periplasmic subunit (GKZ85\_RS10170). The permease and outer membrane subunits  
281 of this efflux pump (GKZ85\_RS10160, GKZ85\_RS10165) that belong to the same operon were  
282 among the top 10 most upregulated genes in the *A. macleodii* transcriptome (Fig. 3b, Extended  
283 Data Table 3, Supplementary Data 2). This efflux system presumably removes Aze from the  
284 cytoplasm. Several other efflux transporters and ABC multidrug transporters were among the  
285 most upregulated genes in the presence of Aze relative to controls. Among upregulated genes in  
286 the presence of Aze were secretion systems, protein export, spore formation, stress-response  
287 proteins, heat shock proteins, proteases, and ribosome protection genes (Extended Data Table  
288 3, Supplementary Data 2). Most ribosomal genes were either downregulated or not differentially  
289 expressed while fatty acid degradation was not differentially expressed in the presence of Aze. In  
290 addition, nucleotide metabolism, pyruvate metabolism, oxidative phosphorylation, electron  
291 transfer, amino acid metabolism and biosynthesis, and fatty acid biosynthesis were

292 downregulated (Figs. 1, 3b, Extended Data Table 3). Collectively, these transcriptomic patterns  
293 indicate *A. macleodii* is mitigating the toxic effects of Aze by effluxing it out of the cell while  
294 arresting cellular metabolism. Interestingly, several genes involved in ribosome protection and  
295 response to protein degradation (*rmf*, *hpf*, *hslR*, *hslU*, *hslV*) were upregulated, suggesting Aze  
296 may be disrupting protein synthesis (Extended Data Table 3).

297

## 298 AzeR and xre Transcriptional Networks

299 Due to the stark transcriptional response to Aze in each bacterium, we hypothesized that  
300 transcriptional regulation plays a major role in activating essential pathways that catabolise or  
301 mitigate the toxicity of Aze. To identify transcriptional master regulators for *Phaeobacter* and *A.*  
302 *macleodii*, we performed regulatory impact factor (RIF) analyses (Reverter et al., 2010). Putative  
303 transcriptional factors (TF) in each species were compared to the unique corresponding  
304 differentially expressed gene lists to identify only 29 and 12 regulators with significant scores  
305 (deviating  $\pm 1.96$  standard deviations from the mean;  $P < 0.05$ ) for *Phaeobacter* and *A. macleodii*,  
306 respectively (Supplementary Data 4). Interestingly, *azeR* was the top TF identified in *Phaeobacter*  
307 and was also differentially expressed. In contrast, only two TFs namely XRE family transcriptional  
308 regulator (*xre*), a bacterial TF associated with stress tolerance (Hu et al., 2019), and helix-turn-  
309 helix transcriptional regulators (GKZ85\_RS06065 and GKZ85\_RS16495) were identified while  
310 being differentially expressed in *A. macleodii*. To get insights into putative regulatory mechanisms  
311 during Aze uptake, we used transcriptional coexpression networks, which enabled  
312 characterization of transcriptional patterns during response to disease, stress, or development  
313 (Hartl et al., 2021; Rose et al., 2016; Yao et al., 2015).

314 Significant connections ( $r \geq \pm 0.95$ ) within the initial network identified 286 genes with 7,208  
315 connections in *Phaeobacter* and 274 genes with 7,102 connections in *A. macleodii* (Extended  
316 Data Figure 4). Subnetworks that contain *azeR* and *xre* show that they act as hub genes in  
317 putatively regulating specific categories of genes in *Phaeobacter* and *A. macleodii*, respectively.  
318 The subnetwork of *azeR* shows that it putatively regulates transcription of most of the pathways  
319 that are involved in assimilating Aze in *Phaeobacter*, including *azeTSL*, fatty acid degradation,  
320 butanoate metabolism, glyoxylate and dicarboxylate metabolism and oxidative phosphorylation,  
321 in addition to other genes that may be indirectly affected by Aze catabolism (Figs. 3a, 4a). In  
322 contrast, the subnetwork of *xre* shows that it putatively regulates transcription of the efflux system  
323 implicated in removal of Aze from the cytoplasm of *A. macleodii*, stress proteins and proteases,  
324 protein export, nucleotide metabolism, and amino acid metabolism and biosynthesis (Missiakas

325 et al., 1996) (Figs. 3b, 4b). These findings highlight the potential importance of transcriptional  
326 regulation in mediating the response to Aze and may explain the large differences in response  
327 between both bacteria.

328

### 329 AzeR-AzeT Phylogeny

330 Based on these results, we hypothesized that for a bacterium to efficiently catabolise Aze,  
331 it needs both *azeTSL* to control uptake of Aze and *azeR* to regulate Aze catabolism. Homologs  
332 of *azeR* and *azeT* from *Phaeobacter* and *P. nitroreducens* were used to mine bacterial genomes  
333 for the presence of both genes simultaneously. Genomes belonging to 13 bacterial families that  
334 spanned both marine and terrestrial environments possessed both gene homologs. Surprisingly,  
335 Rhodobacteraceae (to which *Phaeobacter* and many phytoplankton symbionts belong)  
336 constituted the most evolutionarily divergent family and the most abundant in genomes containing  
337 these genes (Fig. 5). Other families included phytopathogens (Pseudomonadaceae), nitrogen-  
338 fixing rhizobia (Rhizobiaceae, Nitrobacteraceae, Oxalobacteraceae) and anoxygenic phototrophs  
339 (Rhodospirillaceae).

340

### 341 Aze Addition to Seawater Mesocosms

342 To examine the influence of Aze on microbial populations, surface seawater was collected  
343 and pre-filtered to remove larger eukaryotes and enrich for prokaryotes. Seawater mesocosms  
344 were supplemented with 100  $\mu$ M Aze or an equivalent volume of Milli-Q water and incubated in  
345 the dark for 16 hours, after which DNA was extracted and 16S rRNA amplicon sequencing was  
346 used to assess prokaryotic diversity. Diversity indices of Aze-treated seawater samples (Shannon  
347 & Simpson) were significantly lower (Wilcox,  $p < 0.05$ ) than control samples after 16 hours, while  
348 the richness of the microbial community was significantly higher (Wilcox,  $p < 0.05$ ) in Aze-treated  
349 seawater samples relative to control samples (Extended Data Fig. 5a). PCoA showed that the  
350 microbial community was significantly different (PERMANOVA,  $p < 0.001$ ) between each sample  
351 group (Extended Data Fig. 5b). Taxonomic classification at the family level showed that  
352 Rhodobacteraceae, SAR11 clade I, Cyanobiaceae, and Flavobacteriaceae constituted >60% of  
353 prokaryotic diversity across all samples. Notably, the abundance of Rhodobacteraceae increased  
354 in the Aze-treated samples (mean ~47%) relative to the T=16 hours control samples (mean ~37%)  
355 (Fig. 6a). Differential abundance analysis with DESeq2 ( $p$ -adjusted value < 0.05) identified 44  
356 ASVs enriched after Aze addition relative to T=16 hours controls. At the genus level, these ASVs

357 belonged to unclassified Rhodobacteraceae (17), archaeal marine group II (19),  
358 *Pseudoalteromonas* (6), *Vibrio* (1), and *Psychrosphaera* (1). Rhodobacteraceae had the highest  
359 mean taxonomic proportion of ASVs ranging from ~1.5 to ~95, suggesting a significant reliance  
360 on Aze, while the archaeal marine group II had the lowest mean ratios of ASVs ranging from  
361 ~0.02 to ~0.04 (Fig. 6b).

362

## 363 Discussion

364 Aze is produced by plants to prime their immune system in response to phytopathogens  
365 (Jung et al., 2009). Its toxic effects against some bacteria, including the acne-causing  
366 *Propionibacterium acnes*, popularized its use in skin care products (Leeming et al., 1986). Aze  
367 has also been shown to have antitumor effects on cancerous cells, as a competitive inhibitor of  
368 mitochondrial oxidoreductases and steroid biosynthesis (Sieber & Hegel, 2014). Despite these  
369 antagonistic effects, early reports show that some bacteria, mainly *Pseudomonads*, are able to  
370 use it as a carbon source (Janota-Bassalik & Wright, 1964). Recently, Aze production by a  
371 ubiquitous diatom has been shown to enable it to selectively promote growth of its bacterial  
372 symbionts while simultaneously inhibiting growth of opportunists (Shibl et al., 2020). The ability of  
373 a single metabolite to selectively inhibit or promote different populations of bacteria  
374 simultaneously poses interesting questions about how this metabolite evolved in the eukaryotic  
375 chemical repertoire to influence their microbiome.

376 The identification of Aze as the putative substrate of a tripartite ATP-independent  
377 periplasmic (TRAP) transporter system is novel. Much less is known about TRAP transporters  
378 and their substrates than ABC transporters, even though our knowledge of the substrates of the  
379 latter is lacking. TRAP transporters are composed of a substrate-binding domain and two  
380 transmembrane segments (large and small permeases), while lacking a nucleotide-binding  
381 domain that is canonical in ABC transporters (Rosa et al., 2018). Recognized substrates for TRAP  
382 transporters vary from sugars, mono- and di-carboxylates, organosulfur molecules, heterocyclic  
383 carboxylates, and amino acids. For dicarboxylates, only C<sub>4</sub>-substrates, such as succinate,  
384 fumarate, and malate, have been identified as substrates for TRAP transporters, which explains  
385 the common annotation of C<sub>4</sub>-dicarboxylate transporter in many bacterial genomes, including  
386 *Phaeobacter*. On the other hand, dicarboxylates with >4 carbons have no known uptake  
387 mechanisms thus far (Mulligan et al., 2011), with the exception of adipate (C<sub>6</sub>) that binds with high  
388 affinity to a tripartite tricarboxylate transporter (TTT) (Rosa et al., 2017). This makes AzeTSL a  
389 putative transporter of the longest chain dicarboxylate molecule known to date. The sheer

390 abundance of dicarboxylate transporters in bacterial genomes begs the question of whether they  
391 transport a variety of  $C_n$ -dicarboxylates, such as  $C_5$ -glutarate,  $C_6$ -adipate,  $C_7$ -pimelate,  $C_8$ -  
392 suberate,  $C_9$ -azelate and  $C_{10}$ -sebacate. Some of these metabolites are produced by primary  
393 producers and thus can potentially serve as growth factors for heterotrophic bacteria (Moran et  
394 al., 2022). Further work is needed to expand the substrate of dicarboxylate TRAP transporters.

395         Whereas TRAP transporters are widespread in bacteria (Mulligan et al., 2007), the IclR-  
396 family transcriptional regulators (to which AzeR belongs) are found in a limited number of taxa  
397 (Bez et al., 2020). The phylogenetic distribution of the AzeR-AzeT proteins shows that bacteria  
398 belonging to the marine Rhodobacteraceae family were evolutionarily highly divergent from other  
399 bacterial families, most of which are terrestrial (Fig. 5). Notably, four marine bacterial families  
400 (Stappiaceae, Rhizobiaceae, Sneathiellaceae, and Rhodospirillaceae) clustered closer to  
401 terrestrial taxa than Rhodobacteraceae, indicating that despite sharing similar ecological traits,  
402 *Phaeobacter* and other Rhodobacteraceae uptake and regulatory systems may have evolved as  
403 a result of adaptive selection.

404         We have shown that while *Phaeobacter* uses fatty acid degradation and subsequently  
405 glyoxylate and dicarboxylate metabolism and butanoate metabolism pathways to catabolise Aze,  
406 *A. macleodii* attempts to mitigate the toxicity of Aze by effluxing it out of the cytoplasm and by  
407 downregulating the ribosome and protein synthesis pathways (Fig. 3). However, the fact that *A.*  
408 *macleodii* possesses a complete fatty acid degradation pathway, similar to other bacteria that  
409 display inhibition by Aze, begs the question of why such bacteria cannot catabolise this  
410 metabolite. The answer may lie in the fact that *Phaeobacter*, and bacteria that catabolise Aze  
411 such as *P. nitroreducens*, possess the transcriptional factor AzeR (Fig. 5). Using regulatory impact  
412 factor analysis, we have shown that *azeR* in *Phaeobacter* putatively regulates its fatty acid  
413 degradation pathway, *azeTSL* along with other pathways essential for the catabolism of Aze (Fig.  
414 4). By activating uptake, fatty acid degradation and other essential genes, AzeR enables bacteria  
415 to efficiently break down Aze. In contrast, bacteria deficient in AzeR are likely unable to activate  
416 these pathways rapidly and are thus prey to the toxic effects of Aze. Nevertheless, *A. macleodii*  
417 is able to recover from Aze, likely through the use of efflux pumps and activation of a variety of  
418 stress-related pathways, which appear to be mediated by the transcriptional factor XRE (Fig. 4b).  
419 While Aze exhibits a wide range of inhibitory activity, in *A. macleodii* ribosome and/or protein  
420 synthesis inhibition seem to be the causative effect of Aze, evidenced by the strong  
421 downregulation of most ribosomal protein coding genes, protein synthesis genes and proteases.  
422 This finding agrees with previous studies that demonstrated the bacteriostatic effects of Aze on



423 protein, DNA and RNA synthesis in *P. acnes* and *Staphylococcus epidermidis* (Bojar et al., 1988;  
424 Bojar et al., 1991).

425 Aze addition to seawater mesocosms induced a statistically significant increase in the  
426 relative abundance of Rhodobacteraceae and other taxa compared to controls. While  
427 Rhodobacteraceae ASVs comprised the most abundant group to be influenced by Aze additions,  
428 highlighting their adaptation to phytoplankton exudates, marine group II archaeal ASVs exhibited  
429 the largest enrichment relative to controls (Fig. 6b). While we cannot discount competitive  
430 interactions from giving rise to the significant enrichment of marine group II Euryarchaeota ASVs,  
431 the possibility that Aze may be a growth substrate for this important group is exciting. Marine  
432 group II Euryarchaeota remains uncultivated, hindering our understanding of its metabolic  
433 capacity, though isotope probing and metagenomic analysis showed its assimilation of  
434 phytoplankton-derived substrates (Orsi et al., 2016). Further work needs to be done to confirm  
435 the link, if any, between Euryarchaeota and Aze.

436

#### 437 **Conclusion**

438 Phytoplankton-derived secondary metabolites play a role in structuring algal microbiomes.  
439 However, the perception and response of these metabolites on microbial heterotrophs remain  
440 largely unknown. Metabolites like Aze may play an important role in ecology by enabling  
441 eukaryotic hosts to selectively promote growth of their symbionts while simultaneously inhibiting  
442 growth of parasitic bacteria. Bacteria that evolve mechanisms to assimilate Aze gain an  
443 advantage over others that cannot in select environments, such as those surrounding  
444 phytoplankton cells, known as the phycosphere, or near plant roots, known as the rhizosphere.  
445 While Aze represents a single mechanism to structure the microbiome of primary producers, it is  
446 likely one of many such metabolites that together work in concert to ensure the maintenance of  
447 healthy microbial communities, which ultimately influence higher trophic levels and control global  
448 biogeochemical cycling.

449



## 450 **Acknowledgments**

451 This work was supported by a grant from the Gordon and Betty Moore Foundation to S.A.A.  
452 (GBMF9335, <https://doi.org/10.37807/GBMF9335>) and by a grant from NYU Abu Dhabi to S.A.A.  
453 (AD179). We thank the NYU Abu Dhabi Core Technology Platforms for support related to mass  
454 spectrometry. We also thank Dain McParland for helping collect seawater samples.

455

456 The authors declare no competing interests.

## 457 **References**

- 458 Alexandre, P. A., Naval-Sánchez, M., Menzies, M., Nguyen, L. T., Porto-Neto, L. R., Fortes, M.  
459 R., & Reverter, A. (2021). Chromatin accessibility and regulatory vocabulary across  
460 indicine cattle tissues. *Genome biology*, 22(1), 1-20.
- 461 Bez, C., Javvadi, S. G., Bertani, I., Devescovi, G., Guarnaccia, C., Studholme, D. J., Geller, A.  
462 M., Levy, A., & Venturi, V. (2020). AzeR, a transcriptional regulator that responds to  
463 azelaic acid in *Pseudomonas nitroreducens*. *Microbiology*, 166(1), 73.
- 464 Bojar, R., Holland, K., Leeming, J., & Cunliffe, W. (1988). Azelaic acid: its uptake and mode of  
465 action in *Staphylococcus epidermidis* NCTC 11047. *Journal of applied bacteriology*, 64(6),  
466 497-504.
- 467 Bojar, R. A., Holland, K. T., & Cunliffe, W. J. (1991). The in-vitro antimicrobial effects of azelaic  
468 acid upon *Propionibacterium acnes* strain P37. *Journal of Antimicrobial Chemotherapy*,  
469 28(6), 843-853.
- 470 Botwright, N. A., Mohamed, A. R., Slinger, J., Lima, P. C., & Wynne, J. W. (2021). Host-parasite  
471 interaction of Atlantic salmon (*Salmo salar*) and the ectoparasite *Neoparamoeba perurans*  
472 in amoebic gill disease. *Frontiers in immunology*, 12, 1900.
- 473 Callahan, B. J., McMurdie, P. J., Rosen, M. J., Han, A. W., Johnson, A. J. A., & Holmes, S. P.  
474 (2016). DADA2: High-resolution sample inference from Illumina amplicon data. *Nature*  
475 *methods*, 13(7), 581-583.
- 476 Chen, S., Zhou, Y., Chen, Y., & Gu, J. (2018). fastp: an ultra-fast all-in-one FASTQ preprocessor.  
477 *Bioinformatics*, 34(17), i884-i890.
- 478 Djurdjevic, I., Zelder, O., & Buckel, W. (2011). Production of glutamic acid in a recombinant  
479 *Escherichia coli* strain. *Applied and environmental microbiology*, 77(1), 320-322.
- 480 Hartl, C. L., Ramaswami, G., Pembroke, W. G., Muller, S., Pintacuda, G., Saha, A., Parsana, P.,  
481 Battle, A., Lage, K., & Geschwind, D. H. (2021). Coexpression network architecture  
482 reveals the brain-wide and multiregional basis of disease susceptibility. *Nature*  
483 *neuroscience*, 24(9), 1313-1323.
- 484 Hu, Y., Hu, Q., Wei, R., Li, R., Zhao, D., Ge, M., Yao, Q., & Yu, X. (2019). The XRE family  
485 transcriptional regulator SrtR in *Streptococcus suis* is involved in oxidant tolerance and  
486 virulence. *Frontiers in cellular and infection microbiology*, 8, 452.
- 487 Janota-Bassalik, L., & Wright, L. (1964). Azelaic acid utilization by a *Pseudomonas*. *Microbiology*,  
488 36(3), 405-414.

- 489 Jung, H. W., Tschaplinski, T. J., Wang, L., Glazebrook, J., & Greenberg, J. T. (2009). Priming in  
490 systemic plant immunity. *Science*, 324(5923), 89-91.
- 491 Khakimov, B., Jespersen, B. M., & Engelsen, S. B. (2014). Comprehensive and comparative  
492 metabolomic profiling of wheat, barley, oat and rye using gas chromatography-mass  
493 spectrometry and advanced chemometrics. *Foods*, 3(4), 569-585.
- 494 Korenblum, E., Dong, Y., Szymanski, J., Panda, S., Jozwiak, A., Massalha, H., Meir, S.,  
495 Rogachev, I., & Aharoni, A. (2020). Rhizosphere microbiome mediates systemic root  
496 metabolite exudation by root-to-root signaling. *Proceedings of the National Academy of  
497 Sciences*, 117(7), 3874-3883.
- 498 Langmead, B., & Salzberg, S. L. (2012). Fast gapped-read alignment with Bowtie 2. *Nature  
499 methods*, 9(4), 357-359.
- 500 Lassmann, T. (2020). Kalign 3: multiple sequence alignment of large datasets. In: Oxford  
501 University Press.
- 502 Leeming, J., Holland, K., & Bojar, R. (1986). The in vitro antimicrobial effect of azelaic acid. *British  
503 Journal of Dermatology*, 115(5), 551-556.
- 504 Letunic, I., & Bork, P. (2021). Interactive Tree Of Life (iTOL) v5: an online tool for phylogenetic  
505 tree display and annotation. *Nucleic acids research*, 49(W1), W293-W296.
- 506 Li, H., Handsaker, B., Wysoker, A., Fennell, T., Ruan, J., Homer, N., Marth, G., Abecasis, G., &  
507 Durbin, R. (2009). The sequence alignment/map format and SAMtools. *Bioinformatics*,  
508 25(16), 2078-2079.
- 509 Liao, Y., Smyth, G. K., & Shi, W. (2014). featureCounts: an efficient general purpose program for  
510 assigning sequence reads to genomic features. *Bioinformatics*, 30(7), 923-930.
- 511 Loos, M., Gerber, C., Corona, F., Hollender, J., & Singer, H. (2015). Accelerated isotope fine  
512 structure calculation using pruned transition trees. *Analytical chemistry*, 87(11), 5738-  
513 5744.
- 514 Love, M. I., Huber, W., & Anders, S. (2014). Moderated estimation of fold change and dispersion  
515 for RNA-seq data with DESeq2. *Genome biology*, 15(12), 1-21.
- 516 Missiakas, D., Betton, J. M., & Raina, S. (1996). New components of protein folding in  
517 extracytoplasmic compartments of Escherichia coli SurA, FkpA and Skp/OmpH. *Molecular  
518 microbiology*, 21(4), 871-884.
- 519 Moran, M. A., Kujawinski, E. B., Schroer, W. F., Amin, S. A., Bates, N. R., Bertrand, E. M.,  
520 Braakman, R., Brown, C. T., Covert, M. W., & Doney, S. C. (2022). Microbial metabolites  
521 in the marine carbon cycle. *Nature Microbiology*, 7(4), 508-523.
- 522 Mulligan, C., Fischer, M., & Thomas, G. H. (2011). Tripartite ATP-independent periplasmic  
523 (TRAP) transporters in bacteria and archaea. *FEMS microbiology reviews*, 35(1), 68-86.
- 524 Mulligan, C., Kelly, D. J., & Thomas, G. H. (2007). Tripartite ATP-independent periplasmic  
525 transporters: application of a relational database for genome-wide analysis of transporter  
526 gene frequency and organization. *Microbial Physiology*, 12(3-4), 218-226.
- 527 Nazzaro-Porro, M. (1987). Azelaic acid. *Journal of the American Academy of Dermatology*, 17(6),  
528 1033-1041.
- 529 Orsi, W. D., Smith, J. M., Liu, S., Liu, Z., Sakamoto, C. M., Wilken, S., Poirier, C., Richards, T. A.,  
530 Keeling, P. J., & Worden, A. Z. (2016). Diverse, uncultivated bacteria and archaea

- 531 underlying the cycling of dissolved protein in the ocean. *The ISME journal*, 10(9), 2158-  
532 2173.
- 533 Price, M. N., Dehal, P. S., & Arkin, A. P. (2010). FastTree 2—approximately maximum-likelihood  
534 trees for large alignments. *PLoS one*, 5(3), e9490.
- 535 Reverter, A., & Chan, E. K. (2008). Combining partial correlation and an information theory  
536 approach to the reversed engineering of gene co-expression networks. *Bioinformatics*,  
537 24(21), 2491-2497.
- 538 Reverter, A., Hudson, N. J., Nagaraj, S. H., Pérez-Enciso, M., & Dalrymple, B. P. (2010).  
539 Regulatory impact factors: unraveling the transcriptional regulation of complex traits from  
540 expression data. *Bioinformatics*, 26(7), 896-904.
- 541 Rosa, L. T., Bianconi, M. E., Thomas, G. H., & Kelly, D. J. (2018). Tripartite ATP-independent  
542 periplasmic (TRAP) transporters and tripartite tricarboxylate transporters (TTT): from  
543 uptake to pathogenicity. *Frontiers in cellular and infection microbiology*, 8, 33.
- 544 Rosa, L. T., Dix, S. R., Rafferty, J. B., & Kelly, D. J. (2017). Structural basis for high-affinity adipate  
545 binding to AdpC (RPA 4515), an orphan periplasmic-binding protein from the tripartite  
546 tricarboxylate transporter (TTT) family in *Rhodospseudomonas palustris*. *The FEBS*  
547 *Journal*, 284(24), 4262-4277.
- 548 Rose, N. H., Seneca, F. O., & Palumbi, S. R. (2016). Gene networks in the wild: identifying  
549 transcriptional modules that mediate coral resistance to experimental heat stress.  
550 *Genome Biology and Evolution*, 8(1), 243-252.
- 551 Searle, T., Ali, F. R., & Al-Niaimi, F. (2020). The versatility of azelaic acid in dermatology. *Journal*  
552 *of Dermatological Treatment*, 1-11.
- 553 Shannon, P., Markiel, A., Ozier, O., Baliga, N. S., Wang, J. T., Ramage, D., Amin, N.,  
554 Schwikowski, B., & Ideker, T. (2003). Cytoscape: a software environment for integrated  
555 models of biomolecular interaction networks. *Genome research*, 13(11), 2498-2504.
- 556 Shen, W., Le, S., Li, Y., & Hu, F. (2016). SeqKit: a cross-platform and ultrafast toolkit for FASTA/Q  
557 file manipulation. *PLoS one*, 11(10), e0163962.
- 558 Shibl, A. A., Isaac, A., Ochsenkühn, M. A., Cárdenas, A., Fei, C., Behringer, G., Arnoux, M., Drou,  
559 N., Santos, M. P., & Gunsalus, K. C. (2020). Diatom modulation of select bacteria through  
560 use of two unique secondary metabolites. *Proceedings of the National Academy of*  
561 *Sciences*, 117(44), 27445-27455.
- 562 Sieber, M., & Hegel, J. (2014). Azelaic acid: properties and mode of action. *Skin pharmacology*  
563 *and physiology*, 27(Suppl. 1), 9-17.
- 564 Smith, S. (2019). phyloSMITH: an R-package for reproducible and efficient microbiome analysis  
565 with phyloseq-objects. *Journal of Open Source Software*, 4(38).
- 566 Spoel, S. H., & Dong, X. (2012). How do plants achieve immunity? Defence without specialized  
567 immune cells. *Nature reviews immunology*, 12(2), 89-100.
- 568 Taboada, B., Estrada, K., Ciria, R., & Merino, E. (2018). Operon-mapper: a web server for precise  
569 operon identification in bacterial and archaeal genomes. *Bioinformatics*, 34(23), 4118-  
570 4120.
- 571 Theil, S., & Rifa, E. (2021). rANOMALY: AmplicoN wOrkflow for Microbial community AnaLYsis.  
572 *F1000Research*, 10.

- 573 Warnes, G., Bolker, B., & Bonebakker, L. (2016). gplots: various R programming tools for plotting  
574 data. *R Package version 3.0, 1*.
- 575 Wickham, H. (2016). *ggplot2: elegant graphics for data analysis*. springer.
- 576 Wittek, F., Hoffmann, T., Kanawati, B., Bichlmeier, M., Knappe, C., Wenig, M., Schmitt-Kopplin,  
577 P., Parker, J. E., Schwab, W., & Vlot, A. C. (2014). Arabidopsis ENHANCED DISEASE  
578 SUSCEPTIBILITY1 promotes systemic acquired resistance via azelaic acid and its  
579 precursor 9-oxo nonanoic acid. *Journal of experimental botany*, 65(20), 5919-5931.
- 580 Yao, P., Lin, P., Gokoolparsadh, A., Assareh, A., Thang, M. W., & Voineagu, I. (2015).  
581 Coexpression networks identify brain region–specific enhancer RNAs in the human brain.  
582 *Nature neuroscience*, 18(8), 1168-1174.
- 583 ZoBell, C. E. (1941). Studies on marine bacteria. I. The cultural requirements of heterotrophic  
584 aerobes. *J mar Res*, 4, 41-75.
- 585 Zoeller, M., Stingl, N., Krischke, M., Fekete, A., Waller, F., Berger, S., & Mueller, M. J. (2012).  
586 Lipid profiling of the Arabidopsis hypersensitive response reveals specific lipid  
587 peroxidation and fragmentation processes: biogenesis of pimelic and azelaic acid. *Plant*  
588 *Physiology*, 160(1), 365-378.
- 589
- 590

591 **Figures and Legends**

592

593

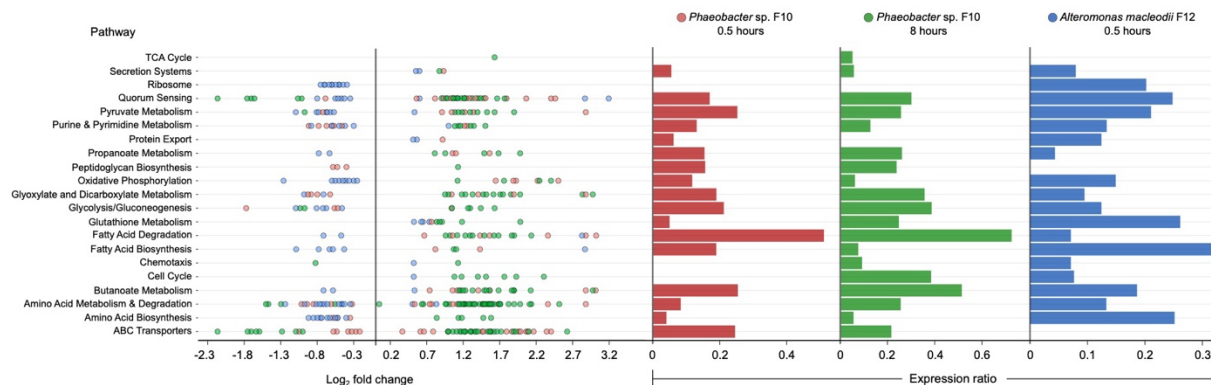

594 **Figure 1. Enriched KEGG pathways in *Phaeobacter* and *A. macleodii*.** Left: Log<sub>2</sub> fold-change  
595 of differentially expressed (DE) genes present in KEGG pathways listed on the y-axis. Each circle  
596 represents the differential expression of a gene in the presence of Aze relative to controls. Right:  
597 Expression ratios of KEGG pathways were calculated as indicated in the methods. Circle and bar  
598 colors indicate the strain and time point (*Phaeobacter* at 0.5 hours=red; *Phaeobacter* at 8  
599 hours=green; *A. macleodii* at 0.5 hours=blue).

600

601

602

603

604

605

606

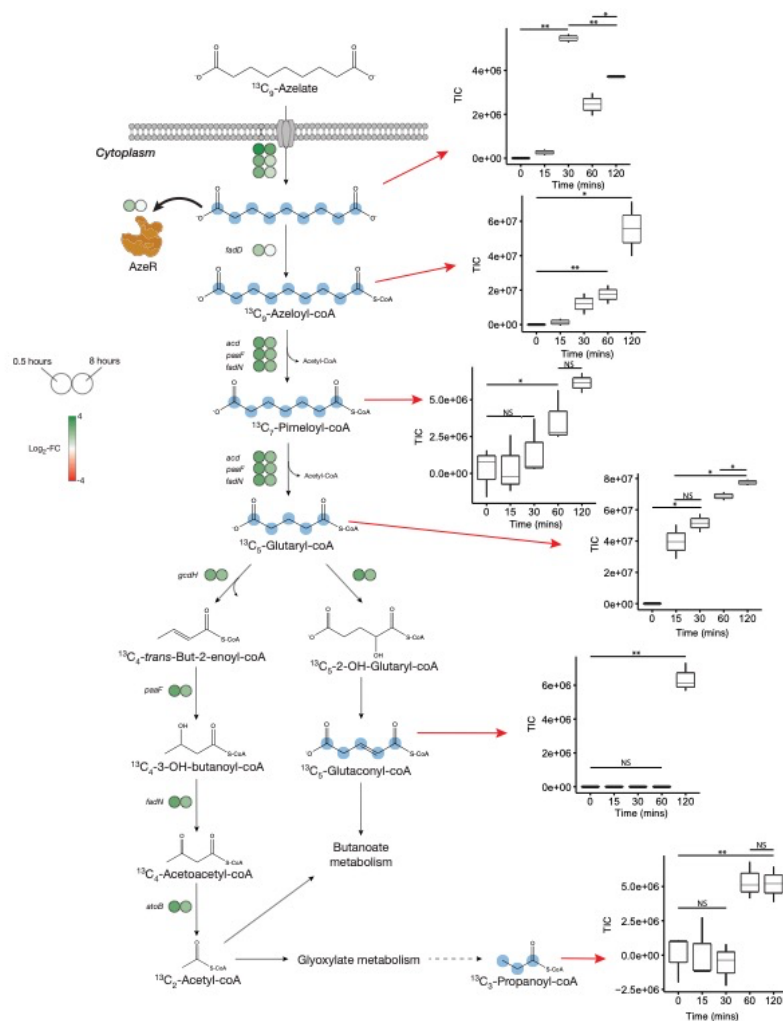

607 **Figure 2. Proposed Azelaic acid catabolism in *Phaeobacter* based on transcriptomics and**  
 608 ***isotope labeling*.** Left: Log<sub>2</sub> fold-change of differentially expressed (DE) genes is shown as  
 609 circles at 0.5 (left circle) and 8 hours (right circle) after the addition of Aze to *Phaeobacter* cells  
 610 relative to controls. The Aze transport system (*azeTSL*) consists of 3 genes, the DE values of which  
 611 are shown next to the transporter. Intermediate reactions for the successive liberation of  
 612 acetyl-coA from azeloyl-coA and pimeloyl-coA are not shown; DE values of the genes involved  
 613 are shown next to each overall reaction. <sup>13</sup>C-labeled metabolites detected in the intracellular  
 614 metabolome of *Phaeobacter* cells are marked with cyan circles at each labeled carbon atom site.  
 615 Right: Relative abundance of each detected labeled metabolite after addition of 100 μM <sup>13</sup>C-Aze  
 616 to *Phaeobacter* cells, shown as total ion current (TIC). Box plot values are based on triplicates.  
 617 NS indicates no significant relative abundance, \* denotes p<0.05 and \*\* denotes p<0.005 based  
 618 on a Student's t-test.  
 619



620

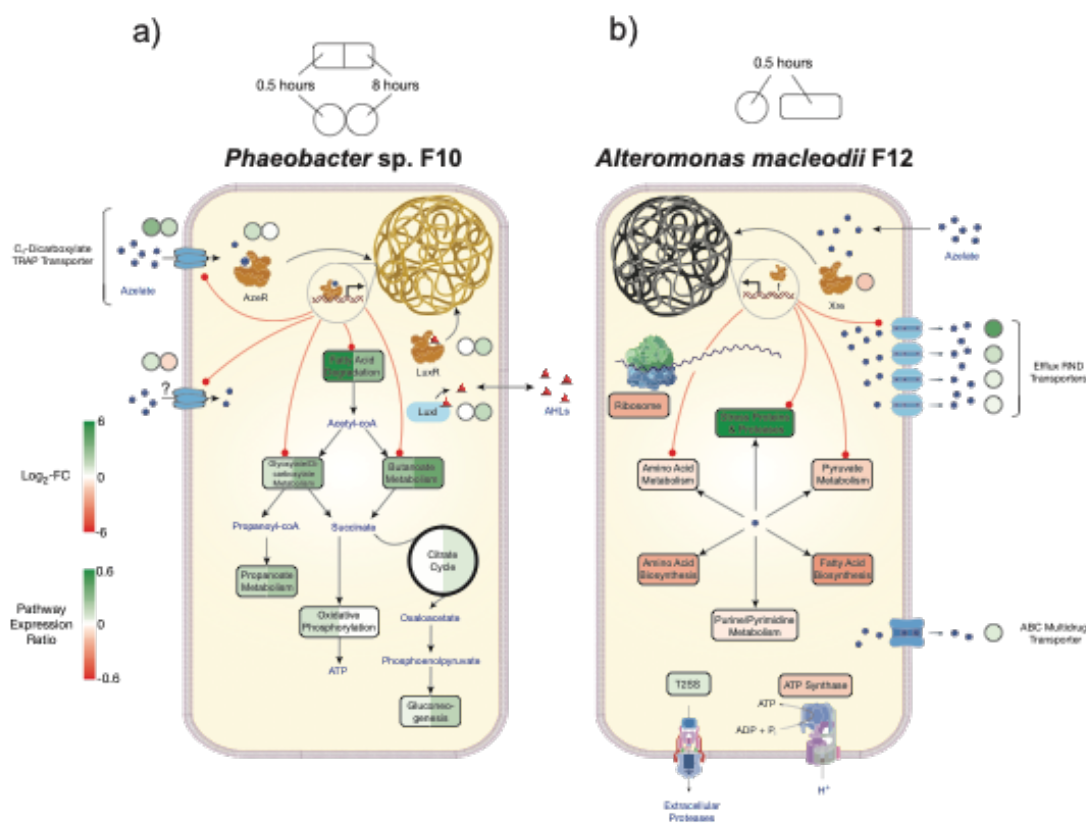

621 **Figure 3. Model of Aze catabolism in (a) *Phaeobacter* and toxic effects in (b) *A. macleodii*.**  
 622 Colored boxes and circles represent metabolic pathway expression ratios and differential gene  
 623 expression ( $\log_2$ -FC), respectively, at 0.5 and 8 hours for *Phaeobacter* and at 0.5 hours for *A.*  
 624 *macleodii*. White circles/boxes indicate no statistically significant DE genes/silent pathway.  
 625 Putative transcriptional factor regulation of pathways/genes is shown by red lines.  $\log_2$ -fold  
 626 change values shown for all transporters represent the mean  $\log_2$ -FC value of all genes in the  
 627 cluster. Pathway expression ratios were the same as in Fig. 1 except the sign of the ratio  
 628 (indicating up- or downregulation) are indicated. Amino acid biosynthesis and metabolism ratios  
 629 in (b) are outside the range of the pathway expression ratio scale (values  $\sim 1.5$ ) but are colored in  
 630 dark red to indicate significant downregulation. T2SS=Type II secretion system, AHLs=acyl-  
 631 homoserine lactones.

632



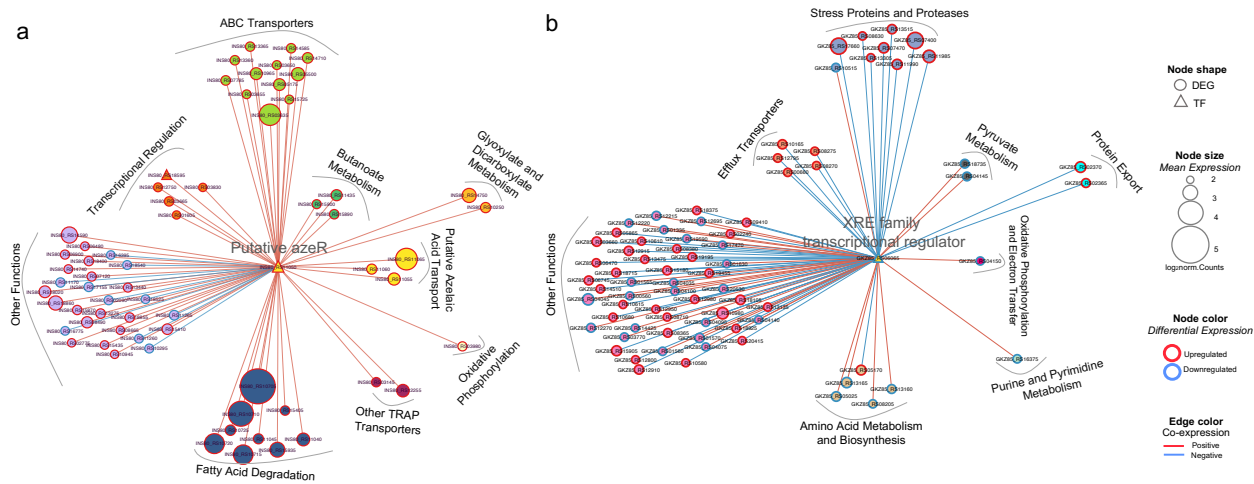

633 **Figure 4. Transcriptional coexpression networks of hub transcriptional factors (TFs) *azeR***  
634 **and *xre*, and their putative target genes in (a) *Phaeobacter* and (b) *A. macleodii*.** Nodes  
635 represent genes (circles) and TFs (triangles) connected by edges based on significant co-  
636 expression correlation (PCIT;  $r \geq \pm 0.95$ ). Nodes are grouped based on functions and represented  
637 by different colors. The size of the node corresponds to the normalized mean expression values  
638 in Aze-treated samples, whereas the color of the node border corresponds to differential  
639 expression. Edge colors indicate the direction of the correlation between each gene pair. DEG =  
640 differentially expressed gene, TF = transcriptional factor.

641

642

643

644

645

646

647

648

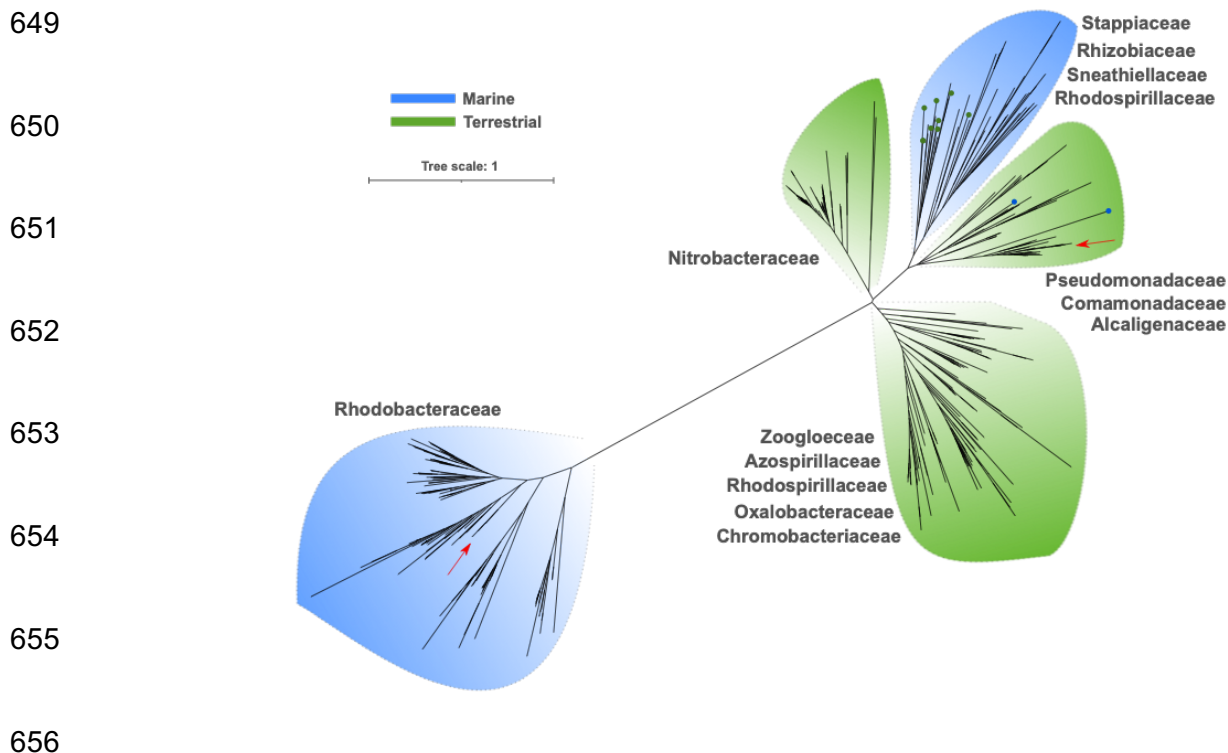

657 **Figure 5. Phylogeny of *azeR* and *azeT* across marine and terrestrial bacterial genomes.** The  
658 phylogenetic tree was inferred using concatenated amino acid sequences of AzeR and AzeT (C<sub>4</sub>-  
659 dicarboxylate TRAP transporter substrate-binding protein) homologs extracted from *Phaeobacter*  
660 and *Pseudomonas nitroreducens*. Branches are colored according to the habitat from which the  
661 taxa were isolated and annotated according to the most dominant families. Green circles within  
662 the marine branch indicate terrestrial taxa, while blue circles within the terrestrial branches  
663 represent marine taxa. Red arrows in the marine and terrestrial branches indicate *Phaeobacter*  
664 and *Pseudomonas nitroreducens* sequences, respectively.  
665

666

667

668

669

670

671

672

673

674

675

676

677

678

679

680

681

682

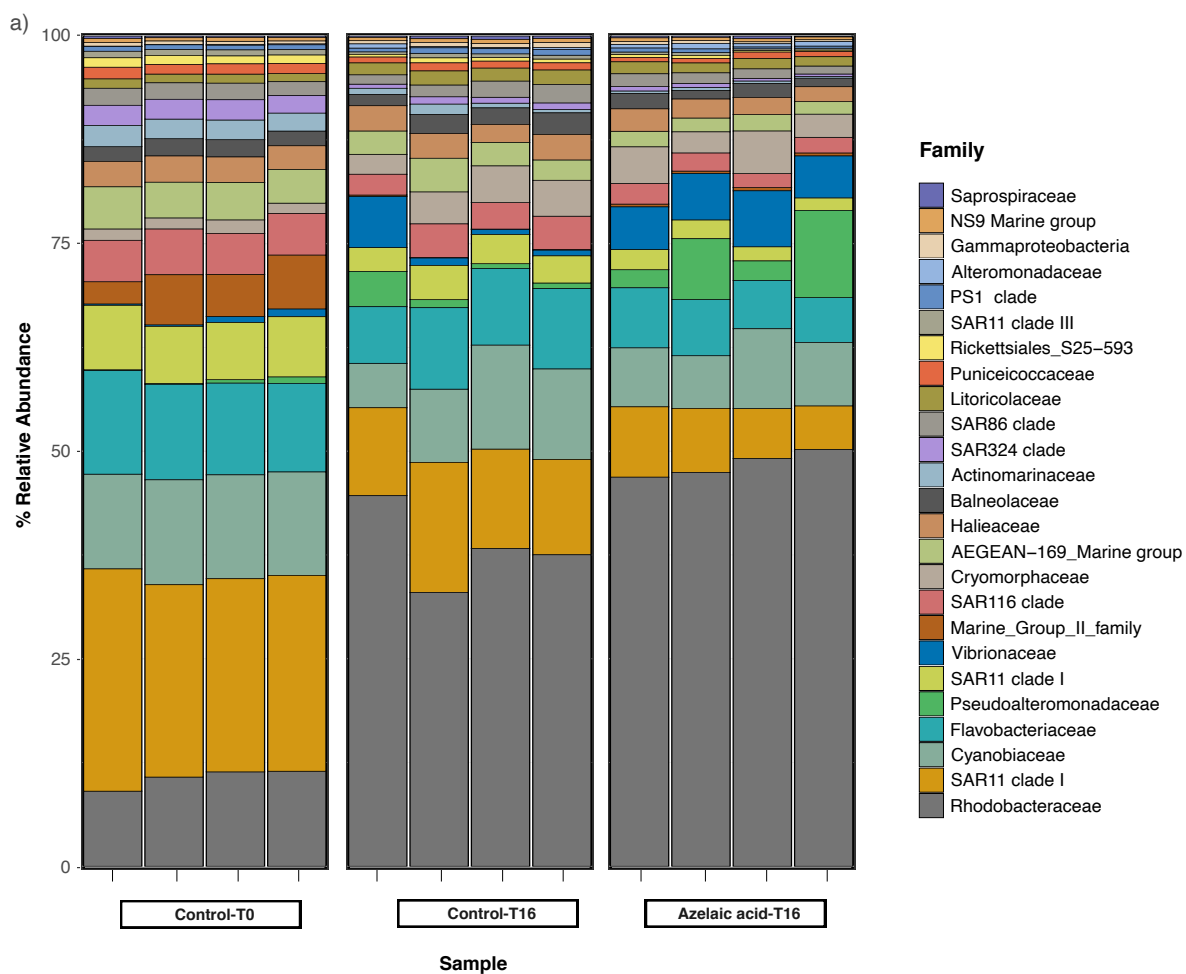

683  
684  
685  
686  
687  
688  
689  
690  
691  
692  
693  
694

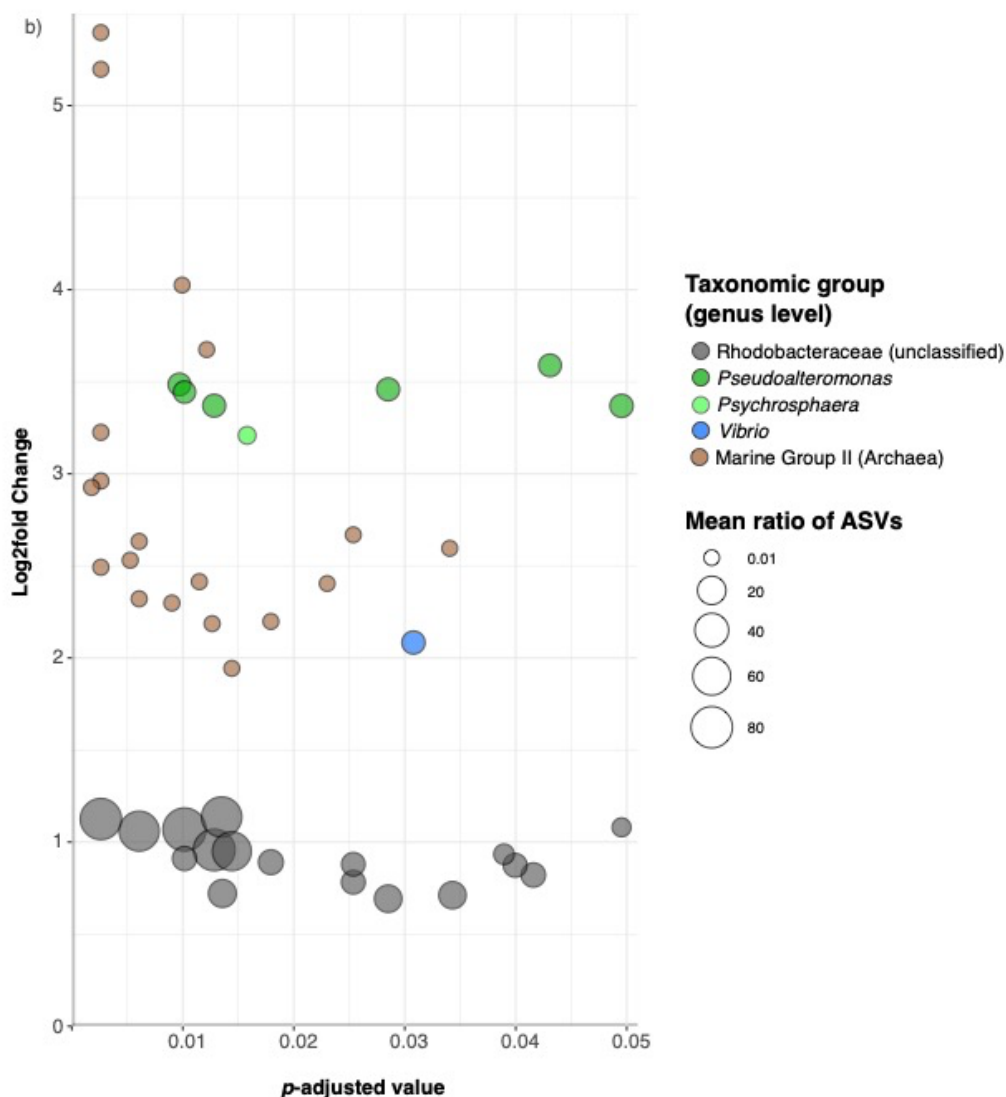

695 **Figure 6. Bacterial and archaeal diversity in seawater samples treated with Aze.** (a) Relative  
696 abundance of the top 25 microbial families based on 16S rRNA amplicon sequencing of Aze-  
697 treated samples at T=16 hours and control samples at T=0 and T=16 hours. (b) Distribution of  
698 the amplicon sequence variants (ASVs) belonging to significantly differentially abundant taxa  
699 between the Aze-treated and control samples at T=16 hours, according to their log<sub>2</sub> fold change  
700 and *p*-adjusted values. The bubble size indicates the mean taxonomic proportion of each ASV,  
701 calculated as the mean number of reads in an ASV : mean number of reads present in all ASVs  
702 of the same taxonomic classification. The bubble color indicates the taxonomic classification of  
703 each ASV according to (a).  
704

705 Extended Data Figures and Legends

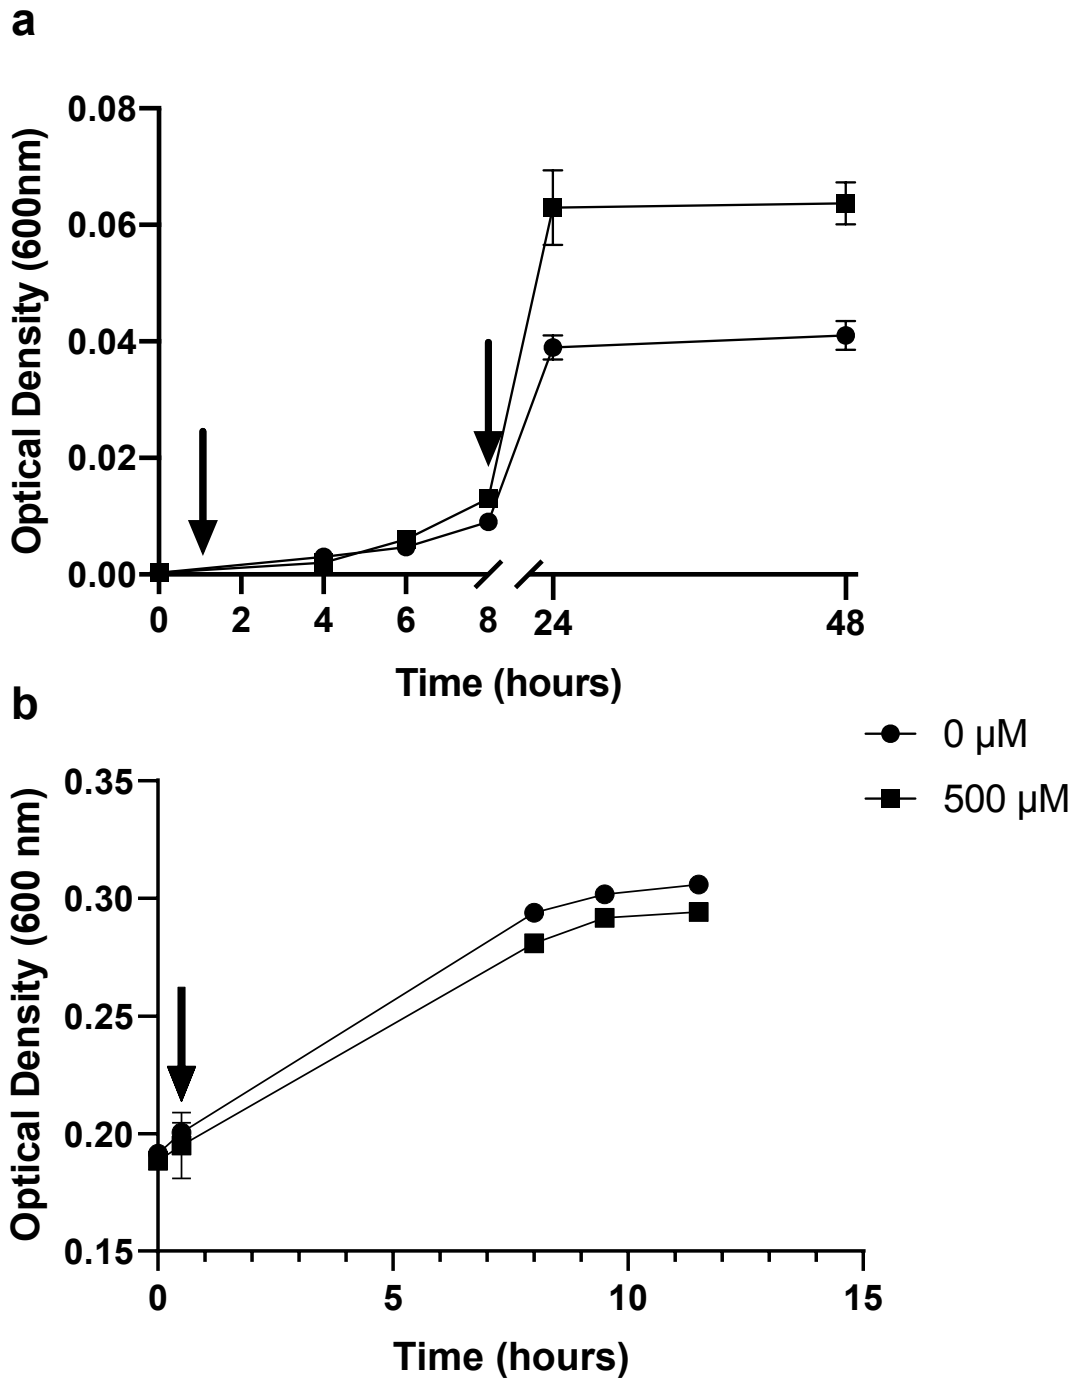

706 Extended Data Figure 1. Effect of Aze on growth of (a) *Phaeobacter* and (b) *A. macleodii*.  
707 500  $\mu$ M Aze was added at T=0 hours to treatments while controls received an equivalent volume  
708 of Milli-Q water. RNA samples were collected at the times marked by arrows. Error bars represent  
709 standard deviation (s.d.) of triplicate cultures.

710

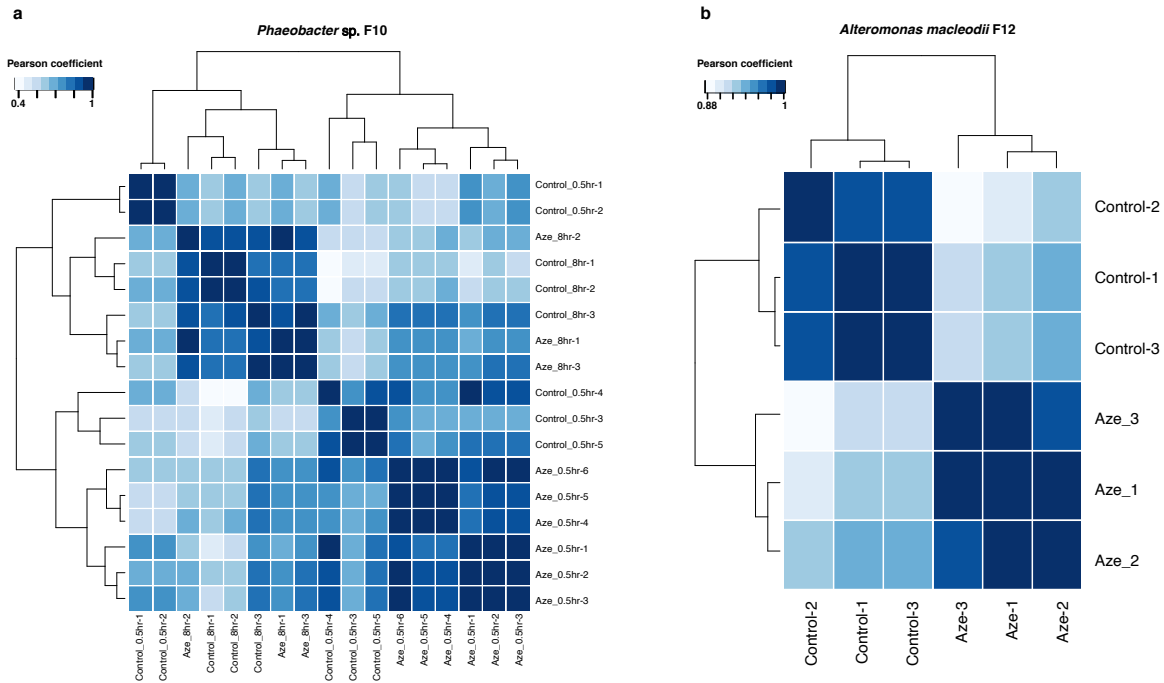

711

712 **Extended Data Figure 2. Comparison of RNASeq data after treatment with Aze relative to**

713 **controls.** Dendrograms indicate the hierarchical clustering of all (a) *Phaeobacter* and (b) *A.*

714 *macleodii* differentially expressed genes based on RNASeq samples. The color gradient refers to

715 the degree of correlation across the samples based on Pearson coefficient.

716

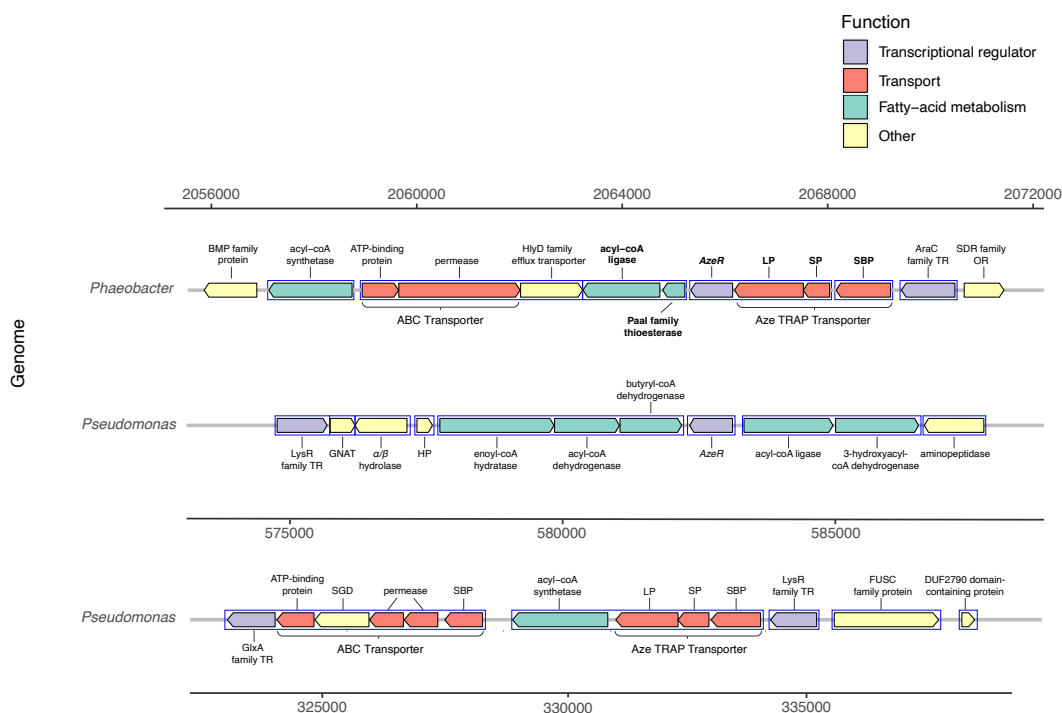

717 **Extended Data Figure 3. Genomic neighborhood structure of *azeR* and *azeTSL* in**  
 718 ***Phaeobacter* and *Pseudomonas nitroreducens* DSM 9128.** Genes predicted *in silico* to belong  
 719 to a single operon are marked by blue boxes. Bold-faced gene abbreviations in *Phaeobacter*  
 720 denote upregulated genes in response to Aze. Operon prediction was carried out using  
 721 OperonMapper (Taboada et al., 2018). *azeT* = substrate-binding protein, *azeS* = small permease,  
 722 *azeL* = large permease, *azeR* = transcriptional regulator, TR = transcriptional regulator, OR =  
 723 oxidoreductase, HP = hypothetical protein, GNAT = GNAT family N-acetyltransferase, SGD =  
 724 succinylglutamate desuccinylase, SBP = substrate-binding protein.  
 725



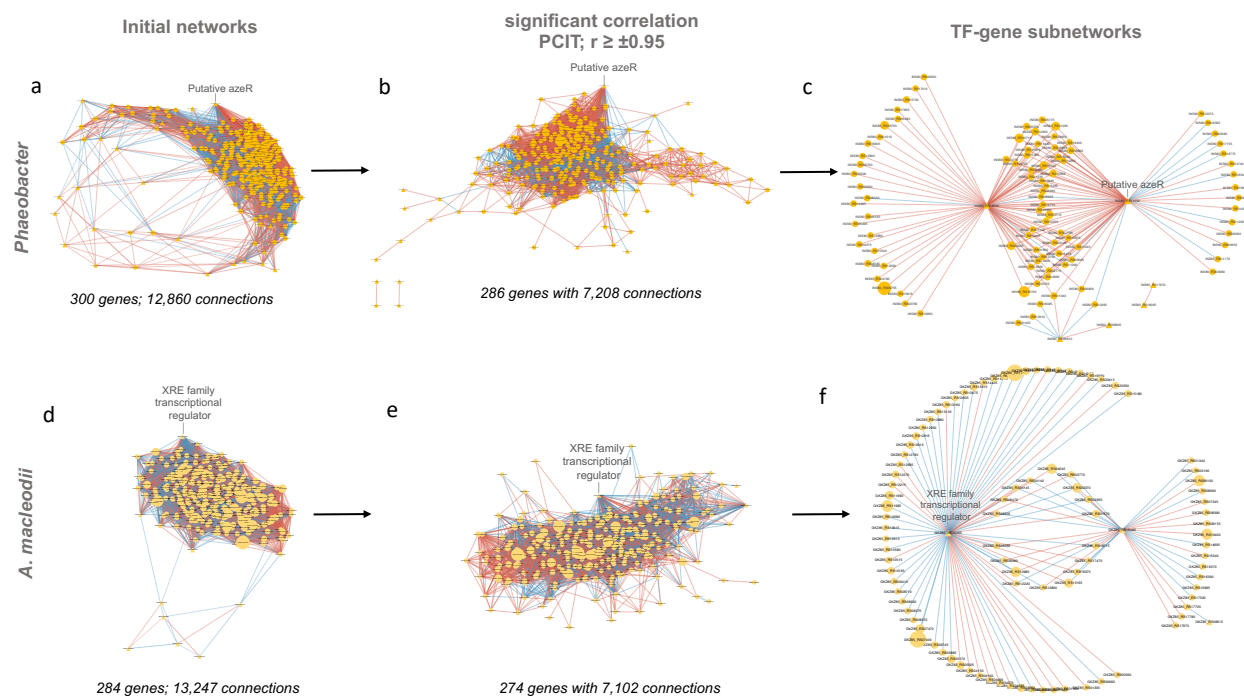

726 **Extended Data Figure 4.** Transcriptional coexpression networks constructed using the Partial  
727 Correlation coefficient with Information Theory algorithm in *Phaeobacter* and *A. macleodii*. Initial  
728 networks (a, d) consisted of key transcriptional factors (TFs) (identified by regulatory impact factor  
729 analysis) and differentially expressed genes. Nodes are depicted either as circles for genes or  
730 triangles for TFs. Edges represent significant interactions between nodes. Edge color represents  
731 directions of the interaction (red for positive correlation and blue for negative correlation). The  
732 size of the node corresponds to the normalized mean expression values in Aze-treated samples.  
733 Subnetworks were extracted from initial networks based on significant co-expression correlation  
734 (PCIT;  $r \geq \pm 0.95$ ) (b, e) and those containing only hub genes (identified based on RIF scores,  
735 differential expression, and the degree centrality) and their connected genes (c, f).  
736

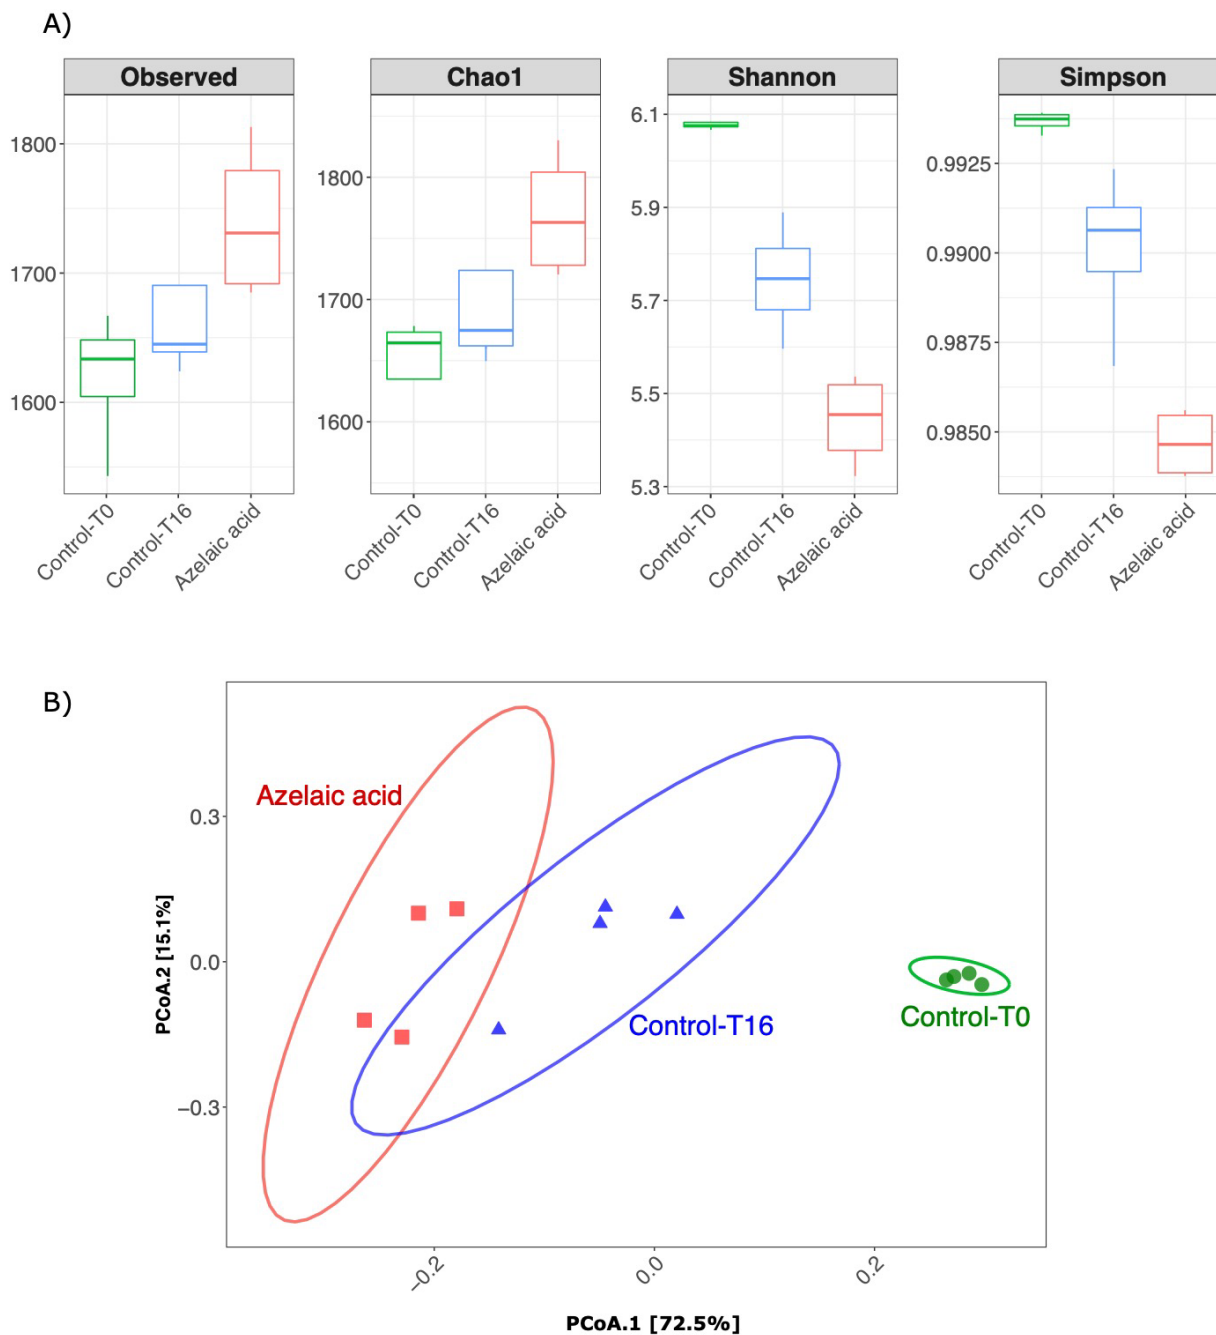

737 **Extended Data Figure 5. Effect of Aze treatment on the alpha and beta-diversity of seawater**  
738 **mesocosms. (a)** Alpha-diversity indices of observed OTUs, Chao1, Shannon and Simpson  
739 across the Aze-treated and control samples. **(b)** PCoA of Bray-Curtis distances (PERMANOVA:  
740  $R^2 = 0.73$ ;  $p < 0.001$ ) between samples. The two principal components (PCoA1 and PCoA2)  
741 explained 72.5% and 15.1% variance, respectively.

742
